# Supplementary material for: Mendelian randomization and Bayesian model averaging of autoimmune diseases and Long COVID
Source: Front Genet. 2024 Jun 20;15:1383162. doi: 10.3389/fgene.2024.1383162 (PMC11240141; doi:10.3389/fgene.2024.1383162)
Supplement: Supplementary file 1 [file Table1.XLSX]

## Sheet: S1
Supplementary Table S1. Details of urticaria predicting SNPs with Long COVID (with genome-wide significant SNPs).
	SNP	other_allele.exposure	effect_allele.exposure	pval.exposure	beta.exposure	se.exposure	eaf.exposure	R2	F-statistics
1	rs1794275	G	A	1.04e-09	-0.0959201	0.0157171	0.302837	0.00388501	1461.61
2	rs41270541	A	T	6.55e-11	0.21145	0.0323781	0.0452984	0.00386719	1454.88
3	rs56043070	G	A	9.89e-12	0.202522	0.0297476	0.0541117	0.00419861	1580.09
4	rs6703348	C	G	6.32e-09	-0.094918	0.0163422	0.269145	0.00354442	1333.02
5	rs6786351	T	C	1.24e-08	0.0878485	0.0154295	0.677745	0.00337105	1267.59
6	rs6901158	C	T	2.18e-14	0.153122	0.0200441	0.13577	0.00550223	2073.4
7	rs79756150	T	C	1.63e-08	0.159334	0.0282164	0.0616783	0.00293854	1104.48
8	rs9277476	T	A	4.25e-10	0.180979	0.0289827	0.0575698	0.00355411	1336.67

## Sheet: S2
Supplementary Table S2. Details of T1D predicting SNPs with Long COVID (with genome-wide significant SNPs).
	SNP	other_allele.exposure	effect_allele.exposure	pval.exposure	beta.exposure	se.exposure	eaf.exposure	R2	F-statistics
1	rs10807130	G	T	1.28e-53	-0.339609	0.0220296	0.167022	0.0320919	10521.6
2	rs10946833	G	A	7.57e-38	-0.266362	0.0207127	0.185682	0.0214555	6957.93
3	rs11102634	C	A	5.48e-09	0.229849	0.0394117	0.0377392	0.00383708	1222.34
4	rs111455094	T	C	1.15e-16	0.470924	0.0568186	0.0139308	0.00609277	1945.32
5	rs111937080	T	C	1.61e-08	0.241496	0.0427436	0.0297524	0.00336709	1072.11
6	rs113257255	C	G	3.58e-08	0.29267	0.0531144	0.0192582	0.00323561	1030.12
7	rs113300080	C	A	4.96e-08	0.296104	0.0543041	0.0159948	0.00275991	878.248
8	rs114311872	C	T	1.18e-46	-0.585448	0.0408171	0.0497914	0.0324325	10637
9	rs114882073	C	T	2.31e-25	-0.647589	0.0622278	0.022436	0.0183958	5947.1
10	rs115048884	C	T	2.23e-62	0.676378	0.0405787	0.0239746	0.0214102	6942.93
11	rs115204205	T	C	2.74e-10	0.264625	0.0419177	0.0311899	0.00423199	1348.68
12	rs115731696	A	G	1.29e-27	0.332973	0.030576	0.0561552	0.0117527	3773.94
13	rs11575840	C	T	2.26e-10	-0.503536	0.0793914	0.0124976	0.00625829	1998.5
14	rs116202062	G	C	5.08e-10	-0.270439	0.0435033	0.0378881	0.00533209	1701.14
15	rs116353692	A	C	8.72e-69	0.664072	0.0378857	0.0285089	0.0244275	7945.88
16	rs116370476	A	G	1.73e-08	-0.349878	0.0620693	0.0189897	0.00456095	1453.99
17	rs116782129	A	G	9.73e-10	-0.247987	0.040562	0.0433681	0.00510274	1627.6
18	rs116807701	G	A	5.22e-30	0.35438	0.031139	0.0523506	0.0124606	4004.1
19	rs116895410	G	T	7.57e-12	0.339922	0.0496489	0.0201588	0.00456466	1455.18
20	rs11752353	G	A	5.88e-34	-0.263166	0.0216634	0.172749	0.0197944	6408.37
21	rs11753487	T	C	4.44e-53	0.31988	0.020859	0.133921	0.0237362	7715.52
22	rs1217238	G	A	1.55e-08	-0.0984515	0.0174072	0.287742	0.00397297	1265.8
23	rs12209273	G	C	1.74e-31	0.29969	0.025673	0.0834848	0.0137443	4422.36
24	rs12661981	C	G	3.67e-24	0.501606	0.049468	0.01722	0.00851618	2725.72
25	rs12928537	G	A	4.28e-12	-0.11948	0.0172469	0.302242	0.00602116	1922.32
26	rs13198285	G	C	1.1e-18	0.432875	0.0490539	0.0189528	0.00696816	2226.78
27	rs13206649	A	C	9.9e-10	0.225715	0.0369355	0.0396391	0.00387891	1235.72
28	rs138242238	C	T	1.86e-08	-0.154667	0.0275004	0.0962184	0.00416051	1325.81
29	rs142776031	G	A	3.64e-13	0.305782	0.0420696	0.0293853	0.00533373	1701.67
30	rs142869490	G	A	1.91e-08	-0.435353	0.0774596	0.0132801	0.00496716	1584.14
31	rs143896361	C	T	1.25e-30	-0.361256	0.0314014	0.0795058	0.0191021	6179.85
32	rs144517729	T	A	9.67e-09	0.184161	0.0321043	0.0585812	0.00374082	1191.56
33	rs1476495	G	C	2.39e-14	-0.249262	0.0326775	0.0712955	0.00822776	2632.64
34	rs148028610	C	T	1.09e-17	0.411028	0.0479921	0.0199923	0.00662011	2114.81
35	rs148420656	T	C	9.1e-20	-0.492482	0.0541237	0.0268273	0.0126642	4070.38
36	rs151233	C	T	2.65e-09	0.136321	0.0229046	0.12325	0.00401623	1279.64
37	rs1565364	G	C	6.66e-25	-0.175052	0.0169865	0.738575	0.0118333	3800.12
38	rs1591805	A	G	6.55e-09	0.0890258	0.0153436	0.451038	0.0039248	1250.39
39	rs1738448	T	C	8.33e-12	-0.191033	0.0279583	0.926092	0.00499565	1593.27
40	rs1742139	T	A	1.52e-16	0.217994	0.0264083	0.892527	0.00911675	2919.71
41	rs17875380	C	A	6.82e-09	0.362153	0.0624898	0.0123981	0.00321182	1022.52
42	rs186844497	G	A	2.76e-17	-0.587514	0.0694771	0.0183083	0.0124077	3986.89
43	rs1872424	T	C	9.37e-09	-0.0906896	0.0157945	0.429843	0.00403134	1284.48
44	rs189117034	A	G	1.05e-19	-0.98928	0.108909	0.0093028	0.0180394	5829.77
45	rs1990760	C	T	2.52e-11	0.106056	0.0158947	0.585658	0.00545888	1741.82
46	rs2267639	C	T	8.47e-16	-0.276784	0.0343949	0.0609813	0.0087737	2808.87
47	rs2289702	C	T	4.58e-08	-0.131116	0.0239844	0.127651	0.00382874	1219.67
48	rs2451370	A	G	2.21e-21	-0.15195	0.0160036	0.669401	0.0102193	3276.44
49	rs2476601	A	G	5.93e-114	-0.44637	0.0196745	0.851736	0.0503223	16815.4
50	rs2748160	T	C	1.83e-09	-0.216198	0.0359594	0.957114	0.00383718	1222.37
51	rs281379	G	A	1.58e-11	0.105862	0.0157047	0.408956	0.0054176	1728.57
52	rs2820241	G	A	9.27e-21	0.458294	0.0490466	0.018618	0.0076752	2454.47
53	rs2847273	A	C	3.38e-11	-0.10445	0.0157564	0.438707	0.00537293	1714.24
54	rs2859059	G	A	1e-200	-0.528282	0.0154588	0.439183	0.137476	50580.1
55	rs28752534	T	C	1e-200	-0.560127	0.0161465	0.37649	0.147299	54818.3
56	rs3087243	G	A	5.82e-24	-0.168952	0.0167364	0.329841	0.0126194	4055.8
57	rs3132498	C	T	1e-200	0.543654	0.0147365	0.403352	0.142258	52631.2
58	rs3134950	C	A	1e-200	0.489761	0.0155138	0.573113	0.117369	42198.2
59	rs3184504	T	C	2.87e-22	-0.151947	0.0156567	0.591357	0.0111586	3580.99
60	rs34337125	G	A	8.13e-15	-0.123605	0.0159171	0.417174	0.00742948	2375.3
61	rs34729112	G	A	1.19e-27	0.551253	0.050586	0.0170678	0.0101961	3268.93
62	rs35741880	T	C	2.31e-11	-0.144679	0.021642	0.164761	0.00576111	1838.81
63	rs35914000	G	A	3.91e-08	0.0871909	0.0158683	0.39213	0.00362421	1154.28
64	rs35947132	G	A	4.54e-09	-0.268058	0.0457191	0.034184	0.00474466	1512.84
65	rs3788013	C	A	4.9e-13	0.117317	0.0162309	0.34395	0.00621132	1983.41
66	rs410234	G	C	1.42e-15	-0.127111	0.0159206	0.393882	0.00771471	2467.2
67	rs41265828	T	A	1e-200	0.931335	0.0303135	0.0383241	0.0639356	21675
68	rs425105	T	C	7.06e-09	-0.122034	0.0210787	0.171673	0.00423541	1349.77
69	rs4755391	G	T	1.85e-08	-0.10193	0.0181189	0.256705	0.00396488	1263.21
70	rs55642707	G	A	3.28e-154	0.466886	0.017649	0.190582	0.0672522	22880.4
71	rs56175143	G	A	2.72e-28	0.363564	0.0329596	0.0487628	0.0122622	3939.58
72	rs57071012	C	T	9.95e-24	-0.483767	0.0481739	0.0353071	0.0159424	5141.09
73	rs60888743	A	G	2.73e-08	-0.104384	0.0187815	0.230404	0.00386412	1230.99
74	rs61819249	G	A	3.58e-09	0.231376	0.0391999	0.0353176	0.00364789	1161.85
75	rs61832754	A	G	5.39e-09	-0.312023	0.0534778	0.0260141	0.00493361	1573.38
76	rs62397630	C	T	3.08e-47	0.414655	0.028724	0.0605647	0.0195655	6332.77
77	rs62399263	G	C	6.22e-62	0.647246	0.0389748	0.0268239	0.0218717	7095.91
78	rs62402380	C	T	4.28e-12	-0.366582	0.0529167	0.0268635	0.00702601	2245.4
79	rs628235	T	C	7.69e-156	0.423119	0.0159096	0.611847	0.0850356	29493
80	rs66944316	C	T	1.43e-182	0.712572	0.0247299	0.0693791	0.0655676	22267.1
81	rs689	A	T	3.79e-110	0.460279	0.0206414	0.790874	0.070079	23914.6
82	rs6908626	G	T	3.63e-15	0.180912	0.0229956	0.115306	0.00667744	2133.25
83	rs6913605	A	G	1e-200	0.524515	0.0152504	0.31346	0.118411	42623.6
84	rs6921589	A	C	2.74e-56	-0.320129	0.0202511	0.858489	0.0249003	8103.6
85	rs7034200	C	A	6.86e-09	0.0901234	0.0155537	0.497391	0.004061	1293.97
86	rs7090530	C	A	1.63e-15	0.134216	0.0168467	0.675477	0.00789759	2526.16
87	rs7130222	T	G	2.31e-08	-0.100921	0.0180637	0.261583	0.00393463	1253.54
88	rs72919002	T	C	4.45e-18	0.140018	0.0161561	0.322046	0.00856083	2740.13
89	rs73394715	G	A	1.19e-12	-0.28535	0.0401551	0.044296	0.00689404	2202.93
90	rs73416462	G	C	4e-09	0.254265	0.0432129	0.0281558	0.00353808	1126.75
91	rs73746675	A	G	4.96e-10	0.159886	0.0257038	0.0913464	0.00424366	1352.41
92	rs74203920	C	T	2.24e-16	0.314781	0.0383473	0.0369202	0.0070465	2251.99
93	rs74293212	G	A	4.33e-17	0.147692	0.0175746	0.245086	0.00807161	2582.27
94	rs77108272	C	A	4.75e-08	-0.280122	0.0513007	0.0274896	0.00419553	1337.01
95	rs7746609	C	T	2.12e-18	-0.136462	0.0155947	0.597729	0.00895523	2867.51
96	rs7775357	G	A	3.04e-10	-0.0988772	0.0157028	0.406913	0.00471892	1504.59
97	rs77989278	G	T	9.65e-11	-0.155702	0.0240566	0.124374	0.0052804	1684.57
98	rs7823699	A	G	6.62e-09	-0.0950068	0.0163794	0.666735	0.00401127	1278.06
99	rs807509	C	G	5.86e-18	0.139136	0.0161125	0.333658	0.00860811	2755.4
100	rs909267	T	C	8.51e-47	-0.590377	0.0410966	0.0507448	0.0335787	11026
101	rs9260370	T	C	9.2e-63	-0.572357	0.0342297	0.072226	0.0439036	14572
102	rs9265832	G	A	1e-200	0.493926	0.0159111	0.60813	0.116277	41754
103	rs9277629	C	T	3.61e-21	-0.293629	0.0310936	0.0766917	0.0122102	3922.66
104	rs9332708	C	T	8.95e-40	-0.79777	0.0604441	0.0254192	0.031533	10332.4
105	rs9379697	A	T	2.52e-20	0.149105	0.016141	0.320437	0.00968248	3102.66
106	rs9391997	A	G	1.65e-11	0.103025	0.0152991	0.474402	0.00529316	1688.66
107	rs9467329	G	C	3.65e-08	0.738719	0.134143	0.00218862	0.00238346	758.169
108	rs9784858	G	C	1e-200	0.771106	0.0194996	0.115949	0.1219	44053.5

## Sheet: S3
Supplementary Table S3. Details of RA predicting SNPs with Long COVID (with genome-wide significant SNPs).
	SNP	other_allele.exposure	effect_allele.exposure	pval.exposure	beta.exposure	se.exposure	eaf.exposure	R2	F-statistics
1	rs10821948	C	A	1.34e-08	0.0760685	0.0133917	0.425718	0.00282935	719.035
2	rs10947467	G	A	6.31e-14	0.109949	0.0146571	0.267189	0.00473394	1205.36
3	rs113421621	C	T	1.14e-25	-0.412119	0.0393466	0.0365205	0.0119524	3065.55
4	rs114944652	C	T	9.76e-10	-0.191085	0.0312572	0.0512618	0.00355159	903.235
5	rs1150769	A	G	5.02e-10	-0.0838469	0.0134833	0.620723	0.00331023	841.648
6	rs11513729	C	T	4.36e-13	0.0978485	0.0135079	0.381047	0.00451621	1149.67
7	rs115749638	C	T	6.22e-10	-0.221059	0.035743	0.0388641	0.00365073	928.54
8	rs117292830	G	A	5.87e-138	0.713732	0.0285474	0.037078	0.0363754	9566.04
9	rs12040903	G	A	2.24e-08	-0.0882858	0.015786	0.2352	0.00280412	712.605
10	rs1217238	G	A	1.05e-08	-0.0843321	0.0147355	0.28697	0.00291045	739.705
11	rs12203746	A	G	5.42e-21	-0.446526	0.0474997	0.0257505	0.0100041	2560.82
12	rs12211739	T	G	2.9e-09	-0.100806	0.016978	0.192057	0.00315365	801.711
13	rs12662306	A	C	3.22e-18	-0.316314	0.0363436	0.0399893	0.00768222	1961.86
14	rs144112342	T	C	6.43e-95	0.805776	0.0389825	0.0186196	0.0237283	6159.25
15	rs16903065	C	A	2.09e-11	-0.143169	0.0213703	0.11551	0.00418833	1065.85
16	rs206763	G	A	9.97e-76	0.788829	0.0428364	0.0155008	0.0189918	4905.97
17	rs2071541	A	G	2.65e-48	-0.263672	0.0180547	0.177172	0.0202704	5243.1
18	rs2223591	G	A	1.98e-13	0.226531	0.0308198	0.0424709	0.00417377	1062.13
19	rs2395153	C	G	1e-200	0.413798	0.0130314	0.39055	0.081512	22489.5
20	rs2476601	A	G	4.83e-92	-0.348863	0.0171448	0.851574	0.0307661	8044.07
21	rs2495969	G	T	1.01e-10	0.136814	0.0211623	0.882679	0.00387677	986.254
22	rs2523710	G	A	3.92e-13	0.124692	0.0171793	0.169951	0.00438667	1116.55
23	rs2736191	C	G	3.41e-32	0.320276	0.027116	0.0525298	0.0102106	2614.2
24	rs28752520	T	C	1.22e-151	-0.47347	0.0180509	0.191876	0.0695206	18933.9
25	rs3087243	G	A	7.01e-14	-0.10625	0.0141899	0.330008	0.00499209	1271.42
26	rs3118470	T	C	1.93e-10	0.0843758	0.0132524	0.441546	0.00351099	892.872
27	rs34167643	C	T	2.39e-16	0.49031	0.0597884	0.00979325	0.00466256	1187.1
28	rs34536443	G	C	3.53e-13	-0.308343	0.0423988	0.030152	0.00556055	1417.01
29	rs3757387	T	C	6.23e-12	0.0913903	0.0132944	0.424981	0.00408208	1038.7
30	rs4274624	C	T	4.84e-13	-0.111284	0.0153928	0.76852	0.0044062	1121.54
31	rs449635	A	G	1.04e-20	0.222787	0.0238737	0.0747759	0.00686781	1752.44
32	rs548877	A	G	1.46e-08	0.0964878	0.0170291	0.176204	0.00270278	686.78
33	rs56175143	G	A	3.66e-22	0.275258	0.028435	0.0493133	0.00710414	1813.18
34	rs6065926	A	G	1.56e-08	0.08477	0.0149909	0.728706	0.00284123	722.063
35	rs62397597	C	T	4.45e-10	-0.162242	0.0260108	0.0762337	0.00370737	942.999
36	rs6456160	T	C	2.34e-09	-0.0792677	0.0132719	0.556647	0.00310136	788.376
37	rs73410785	A	C	3.72e-88	0.507468	0.0254952	0.0552483	0.0268834	7000.86
38	rs74611185	C	A	4.8e-08	0.107229	0.0196439	0.124275	0.00250268	635.809
39	rs7731626	G	A	4.81e-13	-0.108014	0.0149385	0.278813	0.00469192	1194.61
40	rs78248443	C	T	9.69e-12	-0.178636	0.0262275	0.0752716	0.00444236	1130.78
41	rs78300601	C	G	4.4e-11	-0.198107	0.0300618	0.0560203	0.00415086	1056.27
42	rs80026531	A	G	2.77e-08	-0.304613	0.0548335	0.0178435	0.00325228	826.865
43	rs8002731	A	C	7.18e-11	-0.0902776	0.0138528	0.362902	0.00376865	958.645
44	rs9265481	A	G	1.42e-35	0.204404	0.0164199	0.78059	0.0143116	3679.43
45	rs9273367	A	T	8.95e-50	0.211845	0.0142819	0.281392	0.0181497	4684.44
46	rs9277419	A	G	1.84e-61	-0.260384	0.0157411	0.251982	0.0255588	6646.86
47	rs9295682	G	C	9.97e-09	-0.125987	0.0219826	0.104765	0.00297738	756.767
48	rs9368744	C	T	3.33e-20	0.333839	0.0362557	0.0281228	0.0060922	1553.32
49	rs9391630	A	G	4.23e-41	0.190142	0.0141617	0.290064	0.0148902	3830.42
50	rs952579	G	A	2.92e-09	0.0919843	0.0154963	0.225654	0.00295689	751.543

## Sheet: S4
Supplementary Table S4. Details of asthma predicting SNPs with Long COVID (with genome-wide significant SNPs).
	SNP	other_allele.exposure	effect_allele.exposure	pval.exposure	beta.exposure	se.exposure	eaf.exposure	R2	F-statistics
1	rs10519067	G	A	1.76e-09	-0.128748	0.0213917	0.149562	0.00421672	930.553
2	rs112104961	T	G	1.88e-09	0.140225	0.0233418	0.107306	0.0037671	830.955
3	rs11644510	C	T	1.87e-08	-0.0897762	0.0159642	0.33592	0.00359591	793.056
4	rs12950511	C	T	8.97e-14	0.113447	0.015217	0.383485	0.00608566	1345.52
5	rs1444782	G	A	1.76e-10	-0.104784	0.0164216	0.303936	0.0046457	1025.66
6	rs1558641	G	A	2.54e-13	-0.140577	0.0192131	0.197034	0.00625312	1382.78
7	rs1992258	T	C	2.84e-08	-0.0829905	0.0149501	0.451395	0.00341117	752.174
8	rs2516440	G	A	5.16e-10	-0.0970793	0.0156222	0.357965	0.00433194	956.09
9	rs28515515	A	T	1.7e-22	-0.15515	0.0158992	0.341533	0.0108268	2405.24
10	rs3135041	A	G	6.6e-17	0.133844	0.0160217	0.30113	0.00754012	1669.54
11	rs34290285	G	A	2.83e-11	-0.123421	0.0185456	0.217588	0.00518655	1145.69
12	rs56062135	C	T	4e-11	0.109811	0.0166276	0.260652	0.00464763	1026.09
13	rs61578738	T	C	3.9e-08	-0.0874193	0.0159073	0.328886	0.00337354	743.849
14	rs62375550	G	C	3.86e-09	0.165682	0.0281288	0.0709321	0.00361802	797.95
15	rs6594499	C	A	1.74e-14	-0.114309	0.0149056	0.555413	0.00645303	1427.27
16	rs73390208	C	T	2.23e-15	-0.129915	0.0163868	0.307648	0.00719001	1591.45
17	rs74630264	G	A	1.16e-13	-0.210988	0.0284282	0.0819467	0.006698	1481.82
18	rs7641133	T	C	2.54e-09	0.0985524	0.0165397	0.706285	0.00402968	889.109
19	rs7713065	A	C	1.57e-13	-0.113563	0.0153849	0.644389	0.00591054	1306.57
20	rs7848215	C	T	1.06e-13	0.127203	0.0171134	0.236385	0.00584143	1291.2
21	rs7936070	G	T	3.49e-12	0.104353	0.0150013	0.414022	0.00528378	1167.28
22	rs847	T	C	4e-15	-0.120743	0.0153717	0.635982	0.00675028	1493.46
23	rs9303281	G	A	2.09e-18	0.130564	0.014918	0.447608	0.00842989	1868.23

## Sheet: S5
Supplementary Table S5. Details of psoriasis predicting SNPs with Long COVID (with genome-wide significant SNPs).
	SNP	other_allele.exposure	effect_allele.exposure	pval.exposure	beta.exposure	se.exposure	eaf.exposure	R2	F-statistics
1	rs10208309	C	G	1.53e-11	0.144538	0.0214275	0.246191	0.00775403	2890.07
2	rs1082428	C	G	3.35e-11	-0.129455	0.0195251	0.656107	0.0075625	2818.14
3	rs11249215	G	A	1.81e-11	0.126988	0.0188958	0.53724	0.00801825	2989.34
4	rs116490552	C	T	8.53e-13	0.533556	0.0745981	0.0116812	0.00657316	2447.03
5	rs12064698	T	C	3.65e-09	0.126931	0.0215164	0.246327	0.00598219	2225.7
6	rs12513881	C	T	3.32e-09	-0.269771	0.0456082	0.0527729	0.00727588	2710.55
7	rs13220896	G	A	9.53e-15	0.567991	0.0733324	0.0115613	0.00737343	2747.16
8	rs140308704	T	C	3.61e-10	-0.323716	0.0516287	0.041727	0.0083804	3125.5
9	rs144651842	G	A	7.2e-09	0.194484	0.0336116	0.0775744	0.00541312	2012.82
10	rs1655901	T	C	2.99e-50	0.277578	0.0186213	0.469322	0.0383797	14760.4
11	rs1811198	G	T	2.18e-193	0.705911	0.0237962	0.120292	0.105464	43602.1
12	rs197997	C	T	3.54e-08	-0.165041	0.0299405	0.899692	0.00491635	1827.19
13	rs2021511	C	T	1.95e-09	-0.130647	0.0217668	0.265301	0.00665391	2477.29
14	rs2229092	A	C	7.58e-10	-0.276183	0.044883	0.054084	0.0078045	2909.03
15	rs28367848	C	T	2.07e-143	0.508914	0.0199589	0.232158	0.0923367	37622.6
16	rs28998802	G	A	1.13e-13	0.174228	0.0234665	0.184056	0.00911751	3402.94
17	rs3132573	A	G	3.15e-24	-0.189961	0.0187061	0.550022	0.017862	6726.01
18	rs33980500	C	T	2.52e-14	0.256557	0.0336642	0.0723043	0.00883014	3294.72
19	rs34536443	G	C	4.15e-10	-0.384768	0.0615812	0.0303022	0.00870038	3245.89
20	rs60600003	T	G	1.34e-09	0.179414	0.0295939	0.102016	0.00589766	2194.06
21	rs62404579	G	T	3.94e-08	-0.170808	0.031092	0.112368	0.00581999	2164.99
22	rs62443225	G	A	6.28e-11	0.220123	0.0336741	0.0778949	0.00696066	2592.29
23	rs636987	A	C	5.1e-09	-0.112333	0.019222	0.61855	0.00595466	2215.39
24	rs653169	A	G	4.64e-08	-0.103899	0.0190133	0.570342	0.00529067	1967.05
25	rs6556423	C	T	1.61e-34	-0.234098	0.0191046	0.641973	0.0251917	9557.37
26	rs6886974	A	T	1.48e-17	0.429562	0.0503648	0.027836	0.00998684	3730.67
27	rs6922051	T	C	2.6e-15	-0.154578	0.0195454	0.38164	0.0112777	4218.38
28	rs6924795	A	G	1.14e-08	0.360207	0.0631047	0.018575	0.00473064	1757.84
29	rs6933319	C	T	9.02e-24	0.425437	0.0423245	0.039134	0.0136119	5103.52
30	rs696	C	T	1.62e-12	-0.137385	0.0194481	0.389072	0.00897281	3348.44
31	rs74817271	G	A	2.73e-18	0.288284	0.0330514	0.0743597	0.0114407	4280.04
32	rs74838528	C	A	4.7e-18	0.232486	0.0268443	0.123957	0.0117387	4392.87
33	rs78456138	C	T	3.89e-08	-0.416202	0.0757337	0.0204249	0.00693164	2581.41
34	rs847	T	C	1.86e-13	0.146268	0.0198773	0.634799	0.00991966	3705.32
35	rs9266303	G	T	1.13e-22	0.279447	0.0285163	0.104138	0.0145707	5468.32
36	rs9277629	C	T	6.45e-27	0.344468	0.0320669	0.0768717	0.0168406	6334.79

## Sheet: S6
Supplementary Table S6. Details of IBD predicting SNPs with Long COVID (with genome-wide significant SNPs).
	SNP	other_allele.exposure	effect_allele.exposure	pval.exposure	beta.exposure	se.exposure	eaf.exposure	R2	F-statistics
1	rs10224849	G	C	1.31e-18	0.219945	0.0249811	0.108173	0.00933378	3554.58
2	rs1061537	G	A	9.2e-17	-0.140511	0.016899	0.393263	0.00942181	3588.42
3	rs10737481	T	G	1.04e-18	0.144709	0.0163872	0.50972	0.0104664	3990.47
4	rs10748781	C	A	8.38e-23	-0.166721	0.0169608	0.652253	0.0126093	4817.91
5	rs10761659	A	G	3.47e-15	0.129289	0.0164221	0.528015	0.00833159	3169.71
6	rs10799838	T	C	4.3e-08	-0.101515	0.0185308	0.746435	0.00390096	1477.5
7	rs10883714	C	A	2.75e-08	-0.0930518	0.0167468	0.420927	0.00422104	1599.24
8	rs10931828	C	T	9.43e-09	-0.095226	0.0165877	0.441087	0.00447105	1694.39
9	rs11204894	G	T	1.71e-08	-0.105183	0.0186526	0.274586	0.00440743	1670.17
10	rs11579874	G	A	3.07e-15	-0.15776	0.0200001	0.231405	0.00885307	3369.88
11	rs11590283	G	A	2.31e-08	-0.102284	0.0183075	0.737052	0.00405521	1536.16
12	rs116929608	A	G	9.18e-21	0.271997	0.0291059	0.073808	0.0101149	3855.1
13	rs12669103	G	T	2.58e-14	0.153546	0.020156	0.193813	0.00736759	2800.24
14	rs12755372	A	C	1.27e-09	-0.117369	0.0193305	0.250054	0.00516655	1959.33
15	rs13080902	G	T	2.88e-08	-0.112652	0.0203021	0.21618	0.00430071	1629.56
16	rs13165038	T	C	3.69e-13	-0.131144	0.0180475	0.312166	0.00738577	2807.2
17	rs142695953	C	A	1.04e-18	0.18025	0.0204106	0.186332	0.00985179	3753.82
18	rs146249753	C	T	9.24e-14	0.180505	0.0242244	0.121676	0.00696415	2645.83
19	rs17134833	C	T	2.55e-13	0.275959	0.0377173	0.041908	0.00611538	2321.38
20	rs1882597	A	C	2.29e-08	0.203803	0.0364691	0.0469092	0.00371401	1406.43
21	rs1986500	G	A	1.53e-09	0.0999242	0.0165412	0.4437	0.00492913	1868.85
22	rs1990760	C	T	1.42e-09	-0.100243	0.0165616	0.585945	0.00487588	1848.56
23	rs2149560	G	T	1.44e-13	0.12233	0.0165485	0.5532	0.00739761	2811.73
24	rs2823272	T	A	9.44e-09	-0.110287	0.0192122	0.257413	0.00465004	1762.54
25	rs2836883	G	A	4.34e-13	-0.140973	0.0194591	0.247344	0.00739946	2812.44
26	rs2856818	G	A	1.52e-08	-0.0987825	0.0174554	0.341104	0.00438625	1662.11
27	rs3024505	G	A	7.27e-28	0.233901	0.0213767	0.157338	0.0145071	5553.74
28	rs3094165	A	G	6.45e-10	0.103605	0.0167672	0.588667	0.00519822	1971.41
29	rs3197999	G	A	1.65e-24	0.169515	0.0165905	0.391793	0.0136948	5238.43
30	rs35978646	A	T	3.7e-21	0.205215	0.0217371	0.156774	0.0111344	4248.02
31	rs3736162	G	C	4.34e-09	-0.10841	0.0184666	0.28132	0.00475231	1801.49
32	rs376365394	C	T	3.11e-10	0.245757	0.0390526	0.0403465	0.00467694	1772.79
33	rs3827023	C	T	4.22e-11	-0.142287	0.0215715	0.188317	0.00618923	2349.58
34	rs3916232	T	A	1.77e-08	0.10857	0.0192744	0.222869	0.00408313	1546.78
35	rs4372078	T	G	1.74e-10	0.121229	0.0189932	0.738816	0.00567186	2152.06
36	rs4676410	G	A	5.15e-20	0.165787	0.0180974	0.270584	0.0108495	4138.13
37	rs4730275	G	T	1.1e-10	-0.113735	0.0176274	0.333808	0.00575326	2183.12
38	rs4731531	G	A	2.67e-09	0.0981176	0.0164882	0.443054	0.00475109	1801.03
39	rs4807543	G	T	3.64e-08	0.23941	0.0434711	0.0318672	0.00353666	1339.03
40	rs4845140	C	T	2.86e-11	-0.254623	0.0382685	0.0564851	0.00691048	2625.29
41	rs57575888	G	A	1.51e-14	0.168223	0.0218861	0.154666	0.00739987	2812.6
42	rs6017342	A	C	1.48e-13	0.122771	0.0166158	0.55914	0.00743092	2824.49
43	rs62443225	G	A	1.87e-57	0.437998	0.0274155	0.0780748	0.0276173	10715.2
44	rs62453594	T	C	1.69e-17	0.20311	0.023857	0.122976	0.00889866	3387.38
45	rs6426749	G	C	4.63e-10	-0.188555	0.0302597	0.0896761	0.00580469	2202.75
46	rs6556416	A	C	3.89e-09	0.112882	0.0191689	0.742547	0.00487193	1847.06
47	rs6762648	T	A	7.19e-13	-0.140387	0.019564	0.243985	0.00727072	2763.15
48	rs67927699	G	C	9.09e-10	0.102968	0.0168121	0.370237	0.00494415	1874.57
49	rs6956343	C	T	4.67e-27	0.233945	0.0217181	0.153034	0.0141877	5429.69
50	rs6974185	G	A	2.75e-20	-0.160771	0.0174217	0.685609	0.0111427	4251.25
51	rs7551957	T	C	1.58e-17	-0.141423	0.0165966	0.44606	0.00988385	3766.15
52	rs75873940	G	T	4.84e-10	0.185672	0.0298305	0.074325	0.00474369	1798.21
53	rs76279478	G	A	3.97e-09	0.231326	0.0393053	0.039414	0.00405197	1534.92
54	rs76288224	A	G	3.5e-11	0.134187	0.0202587	0.191799	0.00558234	2117.9
55	rs7781433	G	A	3.07e-23	0.286567	0.0288579	0.0745013	0.0113246	4321.42
56	rs7805568	G	A	1.52e-29	-0.341522	0.0302572	0.934252	0.0143289	5484.54
57	rs7866902	G	A	3.19e-08	0.160978	0.0291078	0.0791015	0.00377537	1429.75
58	rs895123	C	G	1.47e-12	0.142454	0.020129	0.193688	0.00633848	2406.6
59	rs9272353	G	C	6.85e-30	-0.246396	0.0216957	0.193124	0.0189208	7276.03
60	rs9607629	A	G	7.43e-12	-0.178254	0.0260259	0.124985	0.00694995	2640.39
61	rs9617090	C	T	5.3e-14	-0.128943	0.0171368	0.372112	0.00776929	2954.11
62	rs9988642	T	C	8.19e-25	-0.459693	0.0446934	0.0458696	0.0184969	7109.92

## Sheet: S7
Supplementary Table S7. Details of CD predicting SNPs with Long COVID (with genome-wide significant SNPs).
	SNP	other_allele.exposure	effect_allele.exposure	pval.exposure	beta.exposure	se.exposure	eaf.exposure	R2	F-statistics
1	rs11770660	C	T	1.84e-12	0.323203	0.0458704	0.152352	0.0269802	10023.9
2	rs13300483	C	T	1.58e-09	0.222331	0.0368348	0.326383	0.0217355	8032.11
3	rs1909129	A	G	2.51e-10	0.22603	0.0357279	0.39045	0.0243185	9010.41
4	rs35978646	A	T	4.35e-08	0.254833	0.046537	0.156078	0.0171075	6292.09
5	rs62443225	G	A	1.88e-25	0.589619	0.056551	0.0773709	0.0496338	18880
6	rs6966019	T	C	1.62e-09	-0.226857	0.0376087	0.69835	0.0216826	8012.1
7	rs7805568	G	A	6.8e-09	-0.374416	0.0646013	0.934649	0.0171254	6298.79

## Sheet: S8
Supplementary Table S8. Details of UC predicting SNPs with Long COVID (with genome-wide significant SNPs).
	SNP	other_allele.exposure	effect_allele.exposure	pval.exposure	beta.exposure	se.exposure	eaf.exposure	R2	F-statistics
1	rs10224849	G	C	3.19e-12	0.21354	0.0306418	0.108121	0.00879437	3341.01
2	rs1042131	C	A	5.75e-12	-0.137989	0.0200402	0.501915	0.00952034	3619.46
3	rs10737481	T	G	9.78e-19	0.177217	0.0200527	0.509662	0.0156971	6005.18
4	rs10748781	C	A	5.6e-14	-0.156268	0.0207885	0.652344	0.0110763	4217.65
5	rs10761659	A	G	2.59e-08	0.111962	0.0201122	0.527956	0.00624815	2367.61
6	rs11209026	G	A	1.04e-12	-0.382291	0.0536539	0.0456921	0.0127452	4861.33
7	rs112266302	G	A	5.81e-09	0.15653	0.0268852	0.154145	0.00638926	2421.42
8	rs115535082	G	A	3.97e-08	0.409415	0.0745426	0.0143327	0.00473605	1791.9
9	rs11658993	C	T	1.83e-11	0.135307	0.020139	0.528238	0.00912479	3467.69
10	rs117954350	G	A	5.66e-13	0.398014	0.0552147	0.0269328	0.00830331	3152.89
11	rs1264711	G	A	6.83e-14	-0.17573	0.0234588	0.260903	0.0119097	4538.81
12	rs12736494	G	A	3.17e-09	-0.137666	0.0232453	0.264236	0.00736909	2795.52
13	rs12769793	T	C	8.17e-09	0.132387	0.0229646	0.243859	0.00646342	2449.71
14	rs13024106	G	A	9.69e-09	-0.115902	0.0202057	0.583289	0.00653026	2475.21
15	rs13165038	T	C	1.61e-09	-0.133349	0.0221051	0.312207	0.00763677	2897.85
16	rs142695953	C	A	1.04e-14	0.19257	0.0248973	0.1863	0.0112431	4281.85
17	rs146249753	C	T	4.52e-10	0.184629	0.0296123	0.121628	0.00728353	2762.82
18	rs147168394	G	A	8.17e-12	0.487218	0.0712775	0.0147893	0.00691757	2623.04
19	rs1878668	T	G	5.9e-09	0.119883	0.0205999	0.595569	0.00692344	2625.28
20	rs2296336	C	G	5.98e-09	-0.122417	0.0210435	0.366827	0.00696141	2639.78
21	rs3024495	C	T	5.91e-24	0.262195	0.025977	0.157263	0.0182221	6989.09
22	rs3104412	A	G	5.75e-14	-0.150948	0.02009	0.463013	0.0113303	4315.46
23	rs3197999	G	A	8.5e-20	0.184657	0.0202772	0.391682	0.016249	6219.81
24	rs34236350	C	T	1.29e-15	0.17698	0.0221354	0.267419	0.0122723	4678.7
25	rs35978646	A	T	1.03e-13	0.198177	0.0266466	0.156716	0.0103806	3949.95
26	rs4263839	A	G	3.3e-08	0.12357	0.0223664	0.706524	0.00633221	2399.67
27	rs4587163	C	T	1.09e-30	-0.264094	0.0229326	0.284129	0.0283725	10996
28	rs4655215	T	C	1.13e-10	-0.148334	0.0230026	0.764144	0.0079311	3010.43
29	rs4731531	G	A	2.09e-08	0.113057	0.0201729	0.443021	0.00630795	2390.41
30	rs4817986	G	T	3.85e-11	-0.157861	0.0238839	0.247267	0.00927656	3525.91
31	rs4845140	C	T	1.09e-10	-0.307627	0.0476677	0.056491	0.010088	3837.46
32	rs6017342	A	C	2.14e-13	0.149349	0.0203476	0.559104	0.0109967	4186.99
33	rs60810442	C	T	6.3e-10	0.152605	0.024683	0.193761	0.00727608	2759.98
34	rs6089926	C	T	2.57e-10	-0.162641	0.0257227	0.207998	0.00871516	3310.65
35	rs62443225	G	A	1.25e-33	0.40874	0.0338188	0.0779957	0.0240286	9271.01
36	rs62453594	T	C	6.77e-09	0.17067	0.0294441	0.122929	0.00628107	2380.16
37	rs6426749	G	C	1.53e-08	-0.210799	0.0372527	0.0897285	0.00725886	2753.4
38	rs6427868	A	G	1.42e-10	-0.159913	0.0249333	0.221321	0.00881411	3348.57
39	rs6956343	C	T	3.53e-16	0.217582	0.0266856	0.152998	0.01227	4677.83
40	rs6967335	C	A	1.7e-14	-0.15636	0.0203828	0.43172	0.0119963	4572.18
41	rs6974185	G	A	1.75e-11	-0.143825	0.0213859	0.685669	0.00891662	3387.87
42	rs7551957	T	C	9.08e-15	-0.15757	0.0203277	0.446144	0.0122701	4677.86
43	rs7781433	G	A	3.36e-16	0.287839	0.0352755	0.0744673	0.0114205	4350.22
44	rs7805568	G	A	3.13e-19	-0.332397	0.0370819	0.934292	0.0135658	5178.61
45	rs7865719	A	G	1.01e-09	0.123757	0.0202607	0.55643	0.00756036	2868.63
46	rs7930763	G	A	3.3e-11	0.133479	0.0201251	0.439905	0.00877963	3335.36
47	rs9607629	A	G	2.36e-10	-0.203038	0.0320473	0.125017	0.0090189	3427.08
48	rs9617090	C	T	6.6e-15	-0.163851	0.0210285	0.372128	0.0125456	4784.22

## Sheet: S9
Supplementary Table S9. Association of AIDs with Long COVID using Mendelian randomization.
id.exposure	id.outcome	method	nsnp	b	se	pval	lo_ci	up_ci	or	or_lci95	or_uci95	Intercept	Intercept P-value	Q	Q P-value	outlier
urticaria	Long COVID	MR Egger	8	-0.562111	0.275521	0.0874233	-1.10213	-0.0220896	0.570004	0.332162	0.978153	0.0767484	0.0774452	/	/	/
urticaria	Long COVID	Weighted median	8	-0.11286	0.121684	0.353676	-0.35136	0.125641	0.893276	0.70373	1.13387	/	/	/	/
urticaria	Long COVID	IVW	8	-0.00825871	0.0903257	0.927149	-0.185297	0.16878	0.991775	0.830857	1.18386	/	/	5.74795	0.569469
urticaria	Long COVID	Simple mode	8	-0.15071	0.191113	0.456223	-0.525292	0.223872	0.860097	0.591383	1.25091	/	/	/	/
urticaria	Long COVID	Weighted mode	8	-0.147838	0.162289	0.392609	-0.465925	0.170249	0.862571	0.627554	1.1856	/	/	/	/
T1D	Long COVID	MR Egger	108	0.00329949	0.0195379	0.866216	-0.0349949	0.0415939	1.0033	0.96561	1.04247	-0.00513292	0.372558	/	/	/
T1D	Long COVID	Weighted median	108	-0.023973	0.0163166	0.141769	-0.0559536	0.00800762	0.976312	0.945583	1.00804	/	/	/	/
T1D	Long COVID	IVW	108	-0.0108492	0.011493	0.345177	-0.0333755	0.0116771	0.989209	0.967175	1.01175	/	/	88.9914	0.896442
T1D	Long COVID	Simple mode	108	-0.00848356	0.0300151	0.777997	-0.0673132	0.050346	0.991552	0.934902	1.05163	/	/	/	/
T1D	Long COVID	Weighted mode	108	-0.0228254	0.0170341	0.183091	-0.0562122	0.0105615	0.977433	0.945339	1.01062	/	/	/	/
RA	Long COVID	MR Egger	50	-0.0320359	0.0423656	0.453238	-0.115072	0.0510006	0.968472	0.891302	1.05232	0.0140609	0.112289	/	/	/
RA	Long COVID	Weighted median	50	0.00530803	0.0347697	0.878664	-0.0628405	0.0734566	1.00532	0.939093	1.07622	/	/	/	/
RA	Long COVID	IVW	50	0.0229044	0.0257397	0.373549	-0.0275455	0.0733542	1.02317	0.97283	1.07611	/	/	59.2818	0.149158
RA	Long COVID	Simple mode	50	0.0457773	0.0586607	0.438924	-0.0691977	0.160752	1.04684	0.933142	1.17439	/	/	/	/
RA	Long COVID	Weighted mode	50	0.0161488	0.0358476	0.654348	-0.0541125	0.0864101	1.01628	0.947326	1.09025	/	/	/	/
asthma	Long COVID	MR Egger	23	0.0672591	0.284257	0.81525	-0.489885	0.624403	1.06957	0.612697	1.86713	-0.0114586	0.73301	/	/	/
asthma	Long COVID	Weighted median	23	-0.019059	0.0610261	0.754805	-0.13867	0.100552	0.981121	0.870515	1.10578	/	/	/	/
asthma	Long COVID	IVW	23	-0.0296305	0.0474228	0.532092	-0.122579	0.0633181	0.970804	0.884636	1.06537	/	/	10.1972	0.984427
asthma	Long COVID	Simple mode	23	0.0101272	0.110258	0.927648	-0.205978	0.226232	1.01018	0.813851	1.25387	/	/	/	/
asthma	Long COVID	Weighted mode	23	0.0143131	0.116012	0.90293	-0.21307	0.241697	1.01442	0.808099	1.27341	/	/	/	/
psoriasis	Long COVID	MR Egger	36	0.0489673	0.0459463	0.294046	-0.0410875	0.139022	1.05019	0.959745	1.14915	-0.00550589	0.620681	/	/	/
psoriasis	Long COVID	Weighted median	36	0.0795873	0.0349883	0.0229249	0.0110103	0.148164	1.08284	1.01107	1.1597	/	/	/	/
psoriasis	Long COVID	IVW	36	0.0391608	0.0237498	0.0991704	-0.00738883	0.0857104	1.03994	0.992638	1.08949	/	/	27.7387	0.80377
psoriasis	Long COVID	Simple mode	36	-0.0316231	0.0727048	0.666267	-0.174124	0.110878	0.968872	0.840192	1.11726	/	/	/	/
psoriasis	Long COVID	Weighted mode	36	0.085956	0.0448728	0.0636213	-0.00199471	0.173907	1.08976	0.998007	1.18994	/	/	/	/
IBD	Long COVID	MR Egger	62	0.0566969	0.0718037	0.432865	-0.0840383	0.197432	1.05833	0.919396	1.21827	-0.000244233	0.982348	/	/	/
IBD	Long COVID	Weighted median	62	0.0534788	0.036522	0.143114	-0.0181043	0.125062	1.05493	0.982059	1.13322	/	/	/	/
IBD	Long COVID	IVW	62	0.0552085	0.0256338	0.0312603	0.00496636	0.105451	1.05676	1.00498	1.11121	/	/	67.487	0.265139
IBD	Long COVID	Simple mode	62	0.0252708	0.0794185	0.751421	-0.130389	0.180931	1.02559	0.877754	1.19833	/	/	/	/
IBD	Long COVID	Weighted mode	62	0.0303467	0.0633952	0.63387	-0.0939078	0.154601	1.03081	0.910367	1.16719	/	/	/	/
CD	Long COVID	MR Egger	7	0.0620367	0.123402	0.636516	-0.179831	0.303904	1.064	0.835411	1.35514	0.00971589	0.796612	/	/	/
CD	Long COVID	Weighted median	7	0.0609215	0.05022	0.225095	-0.0375098	0.159353	1.06282	0.963185	1.17275	/	/	/	/
CD	Long COVID	IVW	7	0.0935783	0.0408966	0.0221276	0.013421	0.173736	1.0981	1.01351	1.18974	/	/	5.35466	0.499194
CD	Long COVID	Simple mode	7	0.0704357	0.0691688	0.347818	-0.0651351	0.206007	1.07298	0.936941	1.22876	/	/	/	/
CD	Long COVID	Weighted mode	7	0.0581737	0.0595654	0.366467	-0.0585746	0.174922	1.0599	0.943108	1.19115	/	/	/	/
UC	Long COVID	MR Egger	48	0.155208	0.0809368	0.0613768	-0.00342774	0.313845	1.1679	0.996578	1.36868	-0.0143567	0.299749	/	/	/
UC	Long COVID	Weighted median	48	0.0686198	0.0359529	0.056313	-0.00184777	0.139087	1.07103	0.998154	1.14922	/	/	/	/
UC	Long COVID	IVW	48	0.0742776	0.0244196	0.00235231	0.0264152	0.12214	1.07711	1.02677	1.12991	/	/	43.8774	0.602676
UC	Long COVID	Simple mode	48	0.0675546	0.0809713	0.40833	-0.091149	0.226258	1.06989	0.912882	1.2539	/	/	/	/
UC	Long COVID	Weighted mode	48	0.0242627	0.0699964	0.730418	-0.11293	0.161456	1.02456	0.893213	1.17522	/	/	/	/

## Sheet: S10
Supplementary Table S10. Details of AIDs predicting SNPs with Long COVID used in the MR-BMA(with genome-wide significant SNPs).
SNP	other_allele.exposure	effect_allele.exposure
rs10043720	G	A
rs10235033	A	G
rs10974892	G	A
rs11190126	C	A
rs11191226	T	G
rs111915868	T	C
rs11204894	T	G
rs115147071	G	T
rs11551684	T	C
rs11590283	A	G
rs116916731	T	C
rs117071851	T	C
rs11810751	C	A
rs11981122	C	A
rs12263718	G	A
rs12328463	A	G
rs12415260	A	G
rs12743974	A	G
rs13003464	G	A
rs13052469	T	C
rs13073958	A	G
rs141768406	C	T
rs1455343	T	G
rs145568234	G	T
rs145835664	A	G
rs146249753	T	C
rs1469149	C	A
rs1588050	C	T
rs17351243	A	G
rs17523802	A	G
rs187115896	T	C
rs2111485	G	A
rs2413583	T	C
rs2734976	T	C
rs28681372	A	G
rs28756733	G	A
rs28803180	C	T
rs2975780	A	T
rs35887628	C	G
rs362522	T	C
rs3816855	T	C
rs3869549	A	T
rs4574921	T	C
rs4731531	A	G
rs4807543	T	G
rs558313832	C	A
rs55884413	A	G
rs6073437	T	C
rs61732321	A	G
rs62290008	G	C
rs62358226	C	A
rs62443164	T	C
rs6694403	A	G
rs6942596	T	C
rs6958339	A	G
rs7130588	G	A
rs72658541	T	C
rs72673802	G	A
rs7512090	T	C
rs7794563	G	A
rs7805568	A	G
rs78077440	A	G
rs78878035	A	G
rs79332994	A	G
rs852456	T	C
rs9261401	T	C
rs9268670	C	T
rs9628674	C	G
rs9837237	T	G
